# Supplementary material for: Outcomes of a Character Strengths–Based Intervention on Self-Esteem and Self-Efficacy of Psychiatrically Hospitalized Youths
Source: Atypon-hosted journal article supplement (doi:10.1176/appi.ps.201500021), 2016-02-01
Supplement: appi.ps.201500021.ds001.pdf [file appi.ps.201500021.ds001.pdf]

**Online Supplemental Material**

## Values in Action (VIA) Classification of Strengths

---

| Virtues            | Character strengths                                                          |
|--------------------|------------------------------------------------------------------------------|
| Wisdom & knowledge | Creativity, curiosity, open-mindedness, love of learning, perspective        |
| Courage            | Honesty & authenticity, bravery, perseverance, zest                          |
| Humanity           | Kindness, love, social intelligence                                          |
| Justice            | Fairness, leadership, teamwork                                               |
| Temperance         | Forgiveness, modesty, prudence, self-regulation                              |
| Transcendence      | Appreciation of beauty, gratitude, hope, humor, spirituality & religiousness |

---

## Demographic and descriptive statistics of participants (N = 81).

| Variable                                 | N  | %    |
|------------------------------------------|----|------|
| Race                                     |    |      |
| White                                    | 66 | 81.5 |
| African American                         | 9  | 11.1 |
| Biracial                                 | 6  | 7.4  |
| Substance abuse                          | 39 | 48.1 |
| Juvenile justice involvement             | 11 | 13.6 |
| Child Protective Services involvement    | 18 | 22.2 |
| Victim of abuse                          |    |      |
| Physical                                 | 13 | 16.0 |
| Sexual                                   | 15 | 18.5 |
| Neglect                                  | 2  | 2.5  |
| Diagnoses                                |    |      |
| Mood disorder                            | 77 | 95.1 |
| Anxiety disorder                         | 25 | 30.9 |
| Eating disorder                          | 4  | 4.9  |
| Psychosis                                | 7  | 8.6  |
| Attention-deficit hyperactivity disorder | 28 | 34.6 |
| Pervasive developmental disorder         | 5  | 6.2  |
| Other Axis I diagnosis                   | 11 | 13.5 |
| Axis II diagnosis                        | 21 | 25.9 |

Example coping skills and ways participants have continued to use their coping skills at follow-up assessments

---

| Character strength              | Participant-identified coping skill                                                                                                                                                                                                                                                                                                                                 |
|---------------------------------|---------------------------------------------------------------------------------------------------------------------------------------------------------------------------------------------------------------------------------------------------------------------------------------------------------------------------------------------------------------------|
| Hope                            | “[Make] a list of things or a journal of plans for the future when feeling a loss of reality or depression”                                                                                                                                                                                                                                                         |
| Curiosity                       | “[Make] a list of things I want to research and when I get depressed go back to that list and find something to research to distract myself”                                                                                                                                                                                                                        |
| Love                            | “Think of all the people who you love and care about, [and ask yourself] do you want to leave them?”                                                                                                                                                                                                                                                                |
| Follow-up assessment time-point | Participant response to “How have you been incorporating your character strengths into coping skills?”                                                                                                                                                                                                                                                              |
| Post-intervention               | <p>“It’s been easier to understand myself through the exercise because it gave me an idea of where I can start on the road to recovery.”</p> <p>“When I feel upset I have my notecards to help me deal with my issues. For example, when I was upset I started to journal because one of my strengths is perseverance.”</p>                                         |
| 2-week follow-up                | <p>“[One of my strengths was humor, so] instead of always putting myself or others down I turn things around and make them into a joke and just laugh about them instead.”</p> <p>“[One of my strengths was humor, and] I find that when my anxiety is bad or I’m depressed I joke around with friends to get my mind off it.”</p>                                  |
| 3-month follow-up               | <p>“One of my strengths was the appreciation of beauty and since then I have invested in a camera and am taking photography classes. This helps me get my mind off things in difficult times.”</p> <p>“By reminding myself that I have skills and can accomplish things I’ve learned to cope in a more healthy way with problems I have and will face in life.”</p> |

---

Fold change in self-efficacy and self-esteem from baseline: experimental vs. comparison

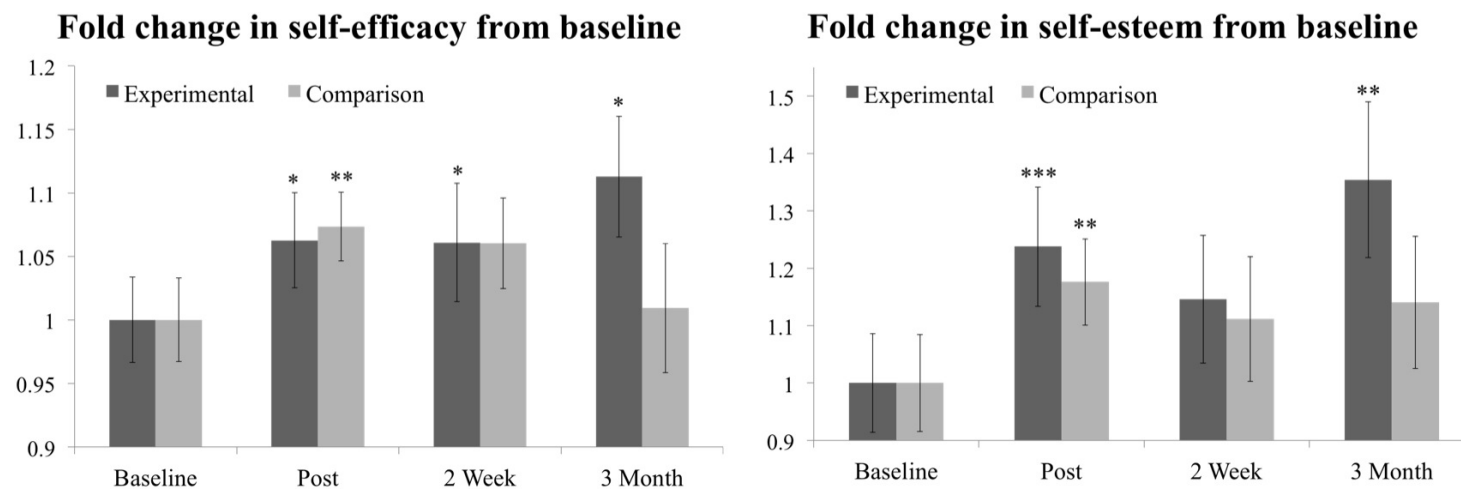

Fold change in self-esteem and self-efficacy scores from baseline to post-intervention and baseline to 2-week and 3-month follow-up for the experimental and comparison groups. Note: significant difference in scores from baseline indicated  $*p < 0.05$ ,  $**p < 0.01$ ,  $***p < 0.001$ .

Fold change in self-efficacy and self-esteem from baseline: using vs. not using strengths

### Fold change in self-efficacy from baseline use vs. don't use strengths

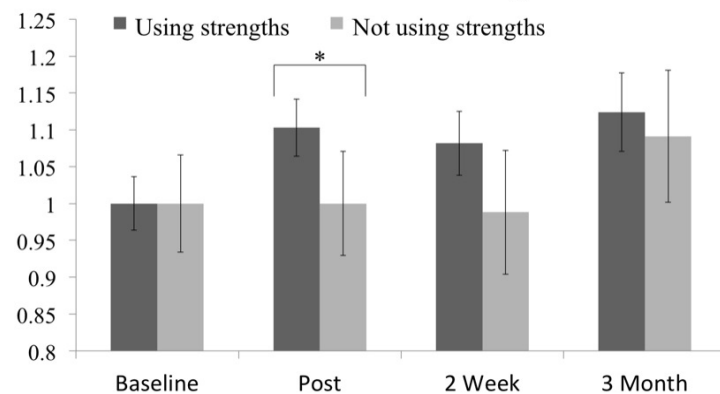

### Fold change in self-esteem from baseline use vs. don't use strengths

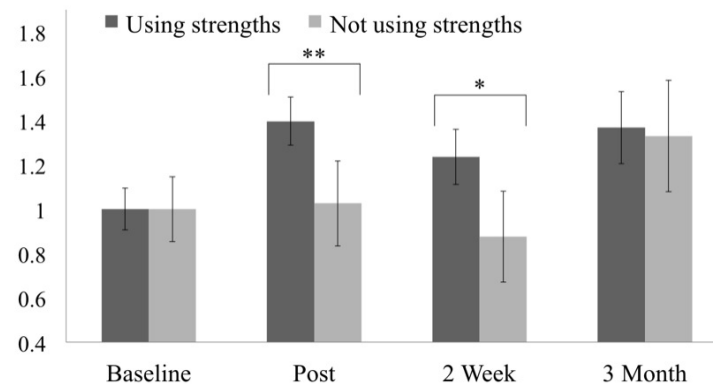

Comparison of fold change in self-esteem and self-efficacy scores from baseline for participants in the experimental group reporting using their strengths as coping skills versus not using their strengths as coping skills at post-intervention and 2-week and 3-month follow-up. Note: significant difference in scores between those using versus not using their strengths are indicated  $*p < 0.05$ ,  $**p < 0.01$ .
